# Supplementary material for: Specific Patterns of Blood ILCs in Metastatic Melanoma Patients and Their Modulations in Response to Immunotherapy
Source: PubMed Central journal article supplement (PMC8004602; doi:10.3390/cancers13061446), 2021-03-22
Supplement: cancers-13-01446-s001.pdf [file cancers-13-01446-s001.pdf]

Table S1. List of mAbs used in the studies.

| Marker | Clone     | Source          | Identifier  |
|--------|-----------|-----------------|-------------|
| CD3    | OKT3      | Biolegend       | 317306      |
| CD4    | RPA-T4    | BD Bioscience   | 555346      |
| CD5    | UCHT2     | Biolegend       | 300606      |
| CD33   | HIM3-4    | Biolegend       | 303304      |
| CD14   | M5E2      | BD Bioscience   | 555397      |
| CD19   | HIB19     | Biolegend       | 302206      |
| TCRAB  | IP26      | Biolegend       | 306706      |
| TCRGD  | B1        | Biolegend       | 331208      |
| CD235a | HI264     | Biolegend       | 349104      |
| CD7    | M-T701    | BD Bioscience   | 562541      |
| CD127  | MB15-18C9 | Miltenyi Biotec | 130-113-410 |
| CD56   | BD159     | BD Bioscience   | 557919      |
| CD16   | 3G8       | BD Bioscience   | 560195      |
| CD117  | 104D2     | BD Bioscience   | 562687      |
| CRTH2  | BM16      | Biolegend       | 350104      |
| NKp46  | 9E2/NKp46 | BD Bioscience   | 562101      |
| NKp30  | P30-15    | BD Bioscience   | 563385      |
| NKG2D  | 1D11      | BD Bioscience   | 563408      |
| DNAM-1 | DX11      | Miltenyi Biotec | 130-099-966 |
| NKG2A  | 131411    | BD Bioscience   | 747917      |
| TIGIT  | 741182    | BD Bioscience   | 747840      |
| CTLA4  | BNI3      | BD Bioscience   | 555854      |
| CD69   | FN50      | BD Bioscience   | 612817      |
| CD62L  | 145/15    | Miltenyi Biotec | 130-113-619 |
| CD96   | NK92.39   | Biolegend       | 338411      |
| CD161  | HP-3G10   | BD Bioscience   | 748280      |
